# Supplementary material for: Characterisation of between-cluster heterogeneity in malaria cluster randomised trials to inform future sample size calculations
Source: Research Square preprint supplement (doi:10.21203/rs.3.rs-5683637/v1), 2025-02-03
Supplement: Supplementary file 1 [file 06d0154830668ae1f0312e20.docx]

**Supplementary information**

**Characterisation of between-cluster heterogeneity in malaria cluster randomised trials to inform future sample size calculations**

**Contents**

[Supplementary Table 1: List of trials that provided data in this meta analysis. 2](#_Toc182895924)

[Supplementary Table 2: Overall characteristics of the trials that provided cluster-level data in this meta- analysis. 3](#_Toc182895925)

[Supplementary table 3: Characteristics of the cluster-level prevalence data for malaria CRTs provided in this meta-analysis 4](#_Toc182895926)

[Supplementary table 4: Characteristics of the cluster-level incidence data for malaria CRTs provided in this meta-analysis 5](#_Toc182895927)

[Supplementary Figure 1: The agreement between the methods of moments and random effects model approaches for estimating prevalence k (coefficient of variation) 6](#_Toc182895928)

[Supplementary Figure 2: Longitudinal patterns in prevalence k estimates for each intervention survey arm (A) and incidence k estimates for each intervention study year arm (B). 7](#_Toc182895929)

[Supplementary Table 5: Factors associated with elevated active-case detection k estimates (k>0.5) for all trial study year arms. 8](#_Toc182895930)

[Supplementary Table 6: Factors associated with elevated passive-case detection k estimates (k>0.5) for all trial study year arms. 9](#_Toc182895931)

[Supplementary Figure 3: Survey-level k values in the control arm and effect size (prevalence ratios) estimations by months since intervention introduction among eight trials that conducted surveys in both malaria and non-malaria seasons. 10](#_Toc182895932)

[Supplementary Table 7: Dummy tables used to obtain prevalence data from malaria CRTs 11](#_Toc182895933)

[Supplementary Table 8: Dummy tables used to obtain active case detection (ACD) incidence data from malaria CRTs 12](#_Toc182895934)

[Supplementary Table 9: Dummy tables used to obtain passive case detection (PCD) incidence data from malaria CRTs 13](#_Toc182895935)

# **Supplementary Table 1: List of trials that provided data in this meta analysis.**

# **Supplementary Table 2: Overall characteristics of the trials that provided cluster-level data in this meta- analysis.**

**Supplementary table 3: Characteristics of the cluster-level prevalence data for malaria CRTs provided in this meta-analysis.** Trial endemicity categorised according to the overall control-arm prevalence reported throughout the trial.

**Supplementary table 4: Characteristics of the cluster-level incidence data for malaria CRTs provided in this meta-analysis** Trial endemicity categorised according to the overall control-arm incidence reported throughout the trial.

**Supplementary Figure 1: The agreement between the methods of moments and random effects model approaches for estimating prevalence k (coefficient of variation)** (green) and incidence k (red) for each survey-arm and study year-arm, respectively.


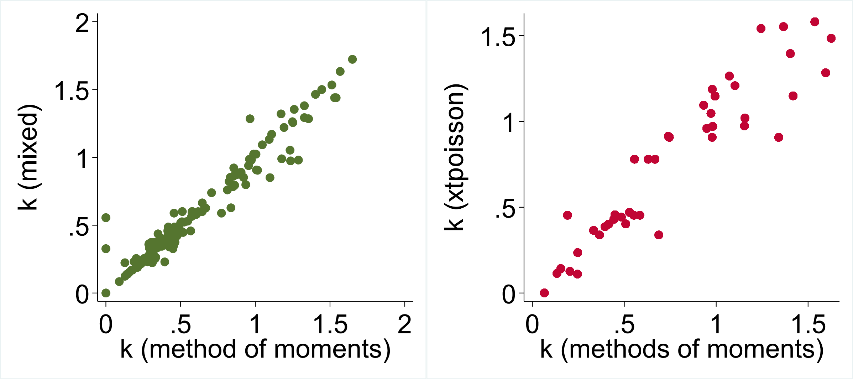


**Supplementary Figure 2: Longitudinal patterns in prevalence k estimates for each intervention survey arm (A) and incidence k estimates for each intervention study year arm (B).** Green: Prevalence, Blue: PCD incidence, Orange: ACD incidence. Error bars: 95%CIs

**
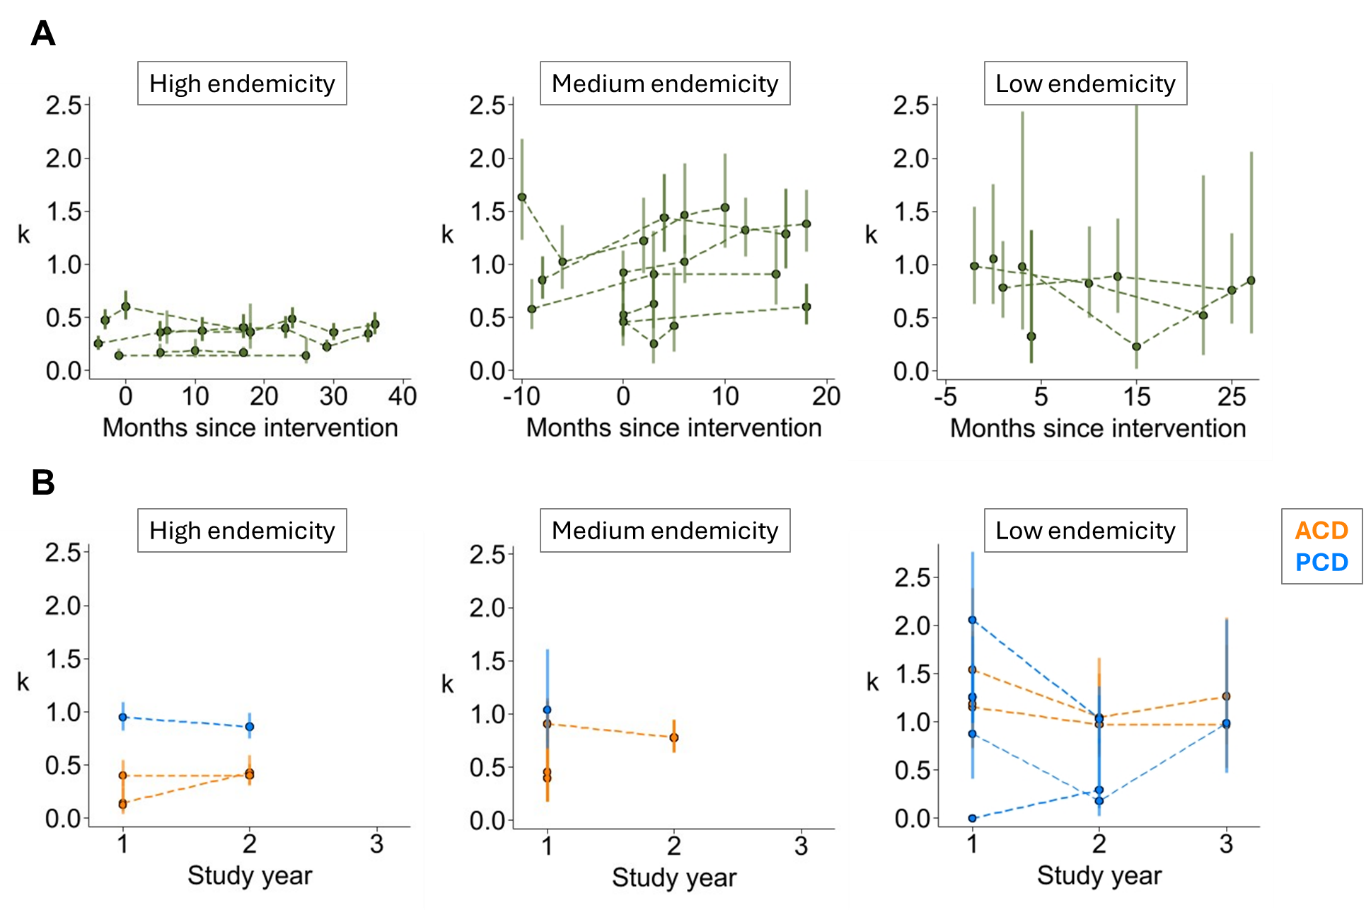
**

# **Supplementary Table 5: Factors associated with elevated active-case detection k estimates (k>0.5) for all trial study year arms.**

# **Supplementary Table 6: Factors associated with elevated passive-case detection k estimates (k>0.5) for all trial study year arms.**

**Supplementary Figure 3: Survey-level k values in the control arm and effect size (prevalence ratios) estimations by months since intervention introduction among eight trials that conducted surveys in both malaria and non-malaria seasons.** Trials 12, 39 and 47 experienced larger effect sizes (lower prevalence ratios) in the malaria seasons when k was higher.


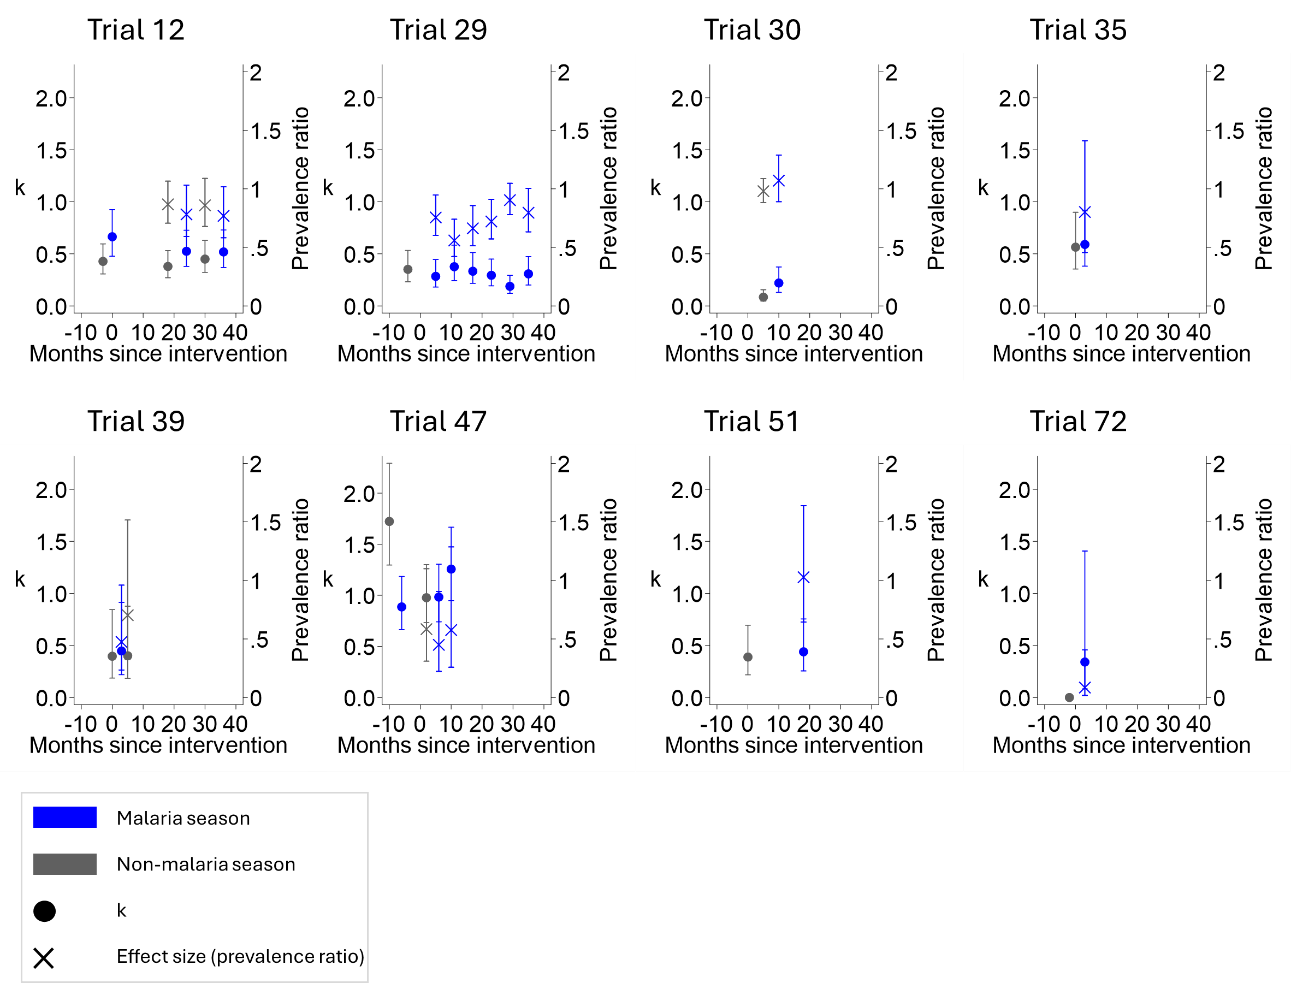


# **Supplementary Table 7: Dummy tables used to obtain prevalence data from malaria CRTs**

# **Supplementary Table 8: Dummy tables used to obtain active case detection (ACD) incidence data from malaria CRTs**

# **Supplementary Table 9: Dummy tables used to obtain passive case detection (PCD) incidence data from malaria CRTs**
